# Supplementary material
Source: PubMed Central journal article supplement (PMC7043259)
Supplement: ejhpharm-2018-001649supp001.pdf [file ejhpharm-2018-001649supp001.pdf]

## **Supplementary appendix**

**Comparative efficacy and safety of interventions for preventing chemotherapy induced oral mucositis in adult cancer patients: a systematic review and network meta-analysis**

Preyanate Wilairat, Kirati Kengkla, Thanatchai Kaewpanan, Jirapat Kaewthong, Sorave Ruankon, Chulalak Subthaweesin, David D. Stenehjem, Surasak Saokaew

**Table S1 Search algorithms**

| Database      | Step | Search algorithm                                                                                                                                                                                                                                                                                                                                                                 | Item found |
|---------------|------|----------------------------------------------------------------------------------------------------------------------------------------------------------------------------------------------------------------------------------------------------------------------------------------------------------------------------------------------------------------------------------|------------|
| <b>Pubmed</b> | #1   | mucositis                                                                                                                                                                                                                                                                                                                                                                        | 7938       |
|               | #2   | stomatitis                                                                                                                                                                                                                                                                                                                                                                       | 26523      |
|               | #3   | chemotherapy                                                                                                                                                                                                                                                                                                                                                                     | 2833741    |
|               | #4   | amifostine                                                                                                                                                                                                                                                                                                                                                                       | 1780       |
|               | #5   | chlorhexidine                                                                                                                                                                                                                                                                                                                                                                    | 9952       |
|               | #6   | cryotherapy                                                                                                                                                                                                                                                                                                                                                                      | 27051      |
|               | #7   | ice*                                                                                                                                                                                                                                                                                                                                                                             | 47270      |
|               | #8   | G-CSF                                                                                                                                                                                                                                                                                                                                                                            | 38993      |
|               | #9   | GCSF                                                                                                                                                                                                                                                                                                                                                                             | 495        |
|               | #10  | GM-CSF                                                                                                                                                                                                                                                                                                                                                                           | 26729      |
|               | #11  | GMCSF                                                                                                                                                                                                                                                                                                                                                                            | 20900      |
|               | #12  | rhGM-CSF                                                                                                                                                                                                                                                                                                                                                                         | 647        |
|               | #13  | rhG-CSF                                                                                                                                                                                                                                                                                                                                                                          | 1171       |
|               | #14  | glutamine                                                                                                                                                                                                                                                                                                                                                                        | 39009      |
|               | #15  | misoprostol                                                                                                                                                                                                                                                                                                                                                                      | 4737       |
|               | #16  | palifermin                                                                                                                                                                                                                                                                                                                                                                       | 1444       |
|               | #17  | KGF                                                                                                                                                                                                                                                                                                                                                                              | 1604       |
|               | #18  | pilocarpine                                                                                                                                                                                                                                                                                                                                                                      | 8474       |
|               | #19  | sucralfate                                                                                                                                                                                                                                                                                                                                                                       | 1946       |
|               | #20  | zinc*                                                                                                                                                                                                                                                                                                                                                                            | 124468     |
|               | #21  | filgrastim                                                                                                                                                                                                                                                                                                                                                                       | 2255       |
|               | #22  | cancer                                                                                                                                                                                                                                                                                                                                                                           | 3377783    |
|               | #23  | tumor                                                                                                                                                                                                                                                                                                                                                                            | 3321854    |
|               | #24  | neoplasm                                                                                                                                                                                                                                                                                                                                                                         | 2898064    |
|               | #25  | malignancy                                                                                                                                                                                                                                                                                                                                                                       | 2888204    |
|               | #26  | oncol*                                                                                                                                                                                                                                                                                                                                                                           | 632018     |
|               | #27  | (mucositis) OR stomatitis                                                                                                                                                                                                                                                                                                                                                        | 32594      |
|               | #28  | ((((((((((((((amifostine) OR chlorhexidine) OR cryotherapy) OR ice*) OR G-CSF) OR GCSF) OR GM-CSF) OR GMCSF) OR rhGM-CSF) OR rhG-CSF) OR glutamine) OR misoprostol) OR palifermin) OR KGF) OR pilocarpine) OR sucralfate) OR zinc*) OR filgrastim                                                                                                                                | 308231     |
|               | #29  | ((((cancer) OR tumor) OR neoplasm) OR malignancy) OR oncol*                                                                                                                                                                                                                                                                                                                      | 3839609    |
|               | #30  | ((((( ( mucositis) OR stomatitis) ) AND chemotherapy) AND (((((((((((((((amifostine) OR chlorhexidine) OR cryotherapy) OR ice*) OR G-CSF) OR GCSF) OR GM-CSF) OR GMCSF) OR rhGM-CSF) OR rhG-CSF) OR glutamine) OR misoprostol) OR palifermin) OR KGF) OR pilocarpine) OR sucralfate) OR zinc*) OR filgrastim)) AND (((((cancer) OR tumor) OR neoplasm) OR malignancy) OR oncol*) | 959        |
| <b>Embase</b> | #1   | mucositis                                                                                                                                                                                                                                                                                                                                                                        | 13166      |
|               | #2   | stomatitis                                                                                                                                                                                                                                                                                                                                                                       | 37271      |
|               | #3   | chemotherapy                                                                                                                                                                                                                                                                                                                                                                     | 702754     |
|               | #4   | cancer                                                                                                                                                                                                                                                                                                                                                                           | 3131730    |
|               | #5   | tumor                                                                                                                                                                                                                                                                                                                                                                            | 2343948    |
|               | #6   | neoplasm                                                                                                                                                                                                                                                                                                                                                                         | 703303     |
|               | #7   | malignancy                                                                                                                                                                                                                                                                                                                                                                       | 182791     |
|               | #8   | oncol*                                                                                                                                                                                                                                                                                                                                                                           | 1142957    |
|               | #9   | amifostine                                                                                                                                                                                                                                                                                                                                                                       | 3707       |
|               | #10  | chlorhexidine                                                                                                                                                                                                                                                                                                                                                                    | 18171      |
|               | #11  | cryotherapy                                                                                                                                                                                                                                                                                                                                                                      | 17341      |
|               | #12  | ice*                                                                                                                                                                                                                                                                                                                                                                             | 68822      |
|               | #13  | G-CSF                                                                                                                                                                                                                                                                                                                                                                            | 1245       |
|               | #14  | GCSF                                                                                                                                                                                                                                                                                                                                                                             | 1041       |

| Database             | Step | Search algorithm                                                                                                                                                                                                                                                                                                                  | Item found |
|----------------------|------|-----------------------------------------------------------------------------------------------------------------------------------------------------------------------------------------------------------------------------------------------------------------------------------------------------------------------------------|------------|
|                      | #16  | ·rhg csf                                                                                                                                                                                                                                                                                                                          | 1376       |
|                      | #17  | glutamine                                                                                                                                                                                                                                                                                                                         | 61145      |
|                      | #18  | misoprostol                                                                                                                                                                                                                                                                                                                       | 10726      |
|                      | #19  | palifermin                                                                                                                                                                                                                                                                                                                        | 610        |
|                      | #20  | kgf                                                                                                                                                                                                                                                                                                                               | 1920       |
|                      | #21  | pilocarpine                                                                                                                                                                                                                                                                                                                       | 15084      |
|                      | #22  | sucralfate                                                                                                                                                                                                                                                                                                                        | 6494       |
|                      | #23  | zinc*                                                                                                                                                                                                                                                                                                                             | 195881     |
|                      | #24  | filgrastim                                                                                                                                                                                                                                                                                                                        | 4469       |
|                      | #25  | ·gm csf                                                                                                                                                                                                                                                                                                                           | 22362      |
|                      | #26  | gmcsf                                                                                                                                                                                                                                                                                                                             | 1269       |
|                      | #27  | neoplasm                                                                                                                                                                                                                                                                                                                          | 22362      |
|                      | #28  | #9 OR #10 OR #11 OR #12 OR #13 OR #14 OR #15 OR #16 OR #17 OR #18 OR #19 OR #20 OR #21 OR #22 OR #23 OR #24 OR #25 OR #26                                                                                                                                                                                                         | 438833     |
|                      | #29  | #1 OR #2                                                                                                                                                                                                                                                                                                                          | 48962      |
|                      | #30  | #4 OR #5 OR #6 OR #7 OR #8                                                                                                                                                                                                                                                                                                        | 4548406    |
|                      | #31  | #3 AND #29 AND #30 AND #31                                                                                                                                                                                                                                                                                                        | 1408       |
| <b>Cochrane</b>      | #1   | mucositis                                                                                                                                                                                                                                                                                                                         | 2049       |
|                      | #2   | stomatitis                                                                                                                                                                                                                                                                                                                        | 2557       |
|                      | #3   | chemotherapy                                                                                                                                                                                                                                                                                                                      | 46195      |
|                      | #4   | cancer                                                                                                                                                                                                                                                                                                                            | 102898     |
|                      | #5   | tumor                                                                                                                                                                                                                                                                                                                             | 27860      |
|                      | #6   | neoplasm                                                                                                                                                                                                                                                                                                                          | 19201      |
|                      | #7   | malignancy                                                                                                                                                                                                                                                                                                                        | 4071       |
|                      | #8   | oncol*                                                                                                                                                                                                                                                                                                                            | 48183      |
|                      | #9   | amifostine                                                                                                                                                                                                                                                                                                                        | 362        |
|                      | #10  | chlorhexidine                                                                                                                                                                                                                                                                                                                     | 2893       |
|                      | #11  | cryotherapy                                                                                                                                                                                                                                                                                                                       | 1320       |
|                      | #12  | ice*                                                                                                                                                                                                                                                                                                                              | 3347       |
|                      | #13  | G-CSF                                                                                                                                                                                                                                                                                                                             | 1924       |
|                      | #14  | GCSF                                                                                                                                                                                                                                                                                                                              | 104        |
|                      | #15  | GM-CSF                                                                                                                                                                                                                                                                                                                            | 186        |
|                      | #16  | GMCSF                                                                                                                                                                                                                                                                                                                             | 62         |
|                      | #17  | rhGM-CSF                                                                                                                                                                                                                                                                                                                          | 162        |
|                      | #18  | rhG-CSF                                                                                                                                                                                                                                                                                                                           | 185        |
|                      | #19  | glutamine                                                                                                                                                                                                                                                                                                                         | 1368       |
|                      | #20  | misoprostol                                                                                                                                                                                                                                                                                                                       | 2359       |
|                      | #21  | palifermin                                                                                                                                                                                                                                                                                                                        | 60         |
|                      | #22  | KGF                                                                                                                                                                                                                                                                                                                               | 55         |
|                      | #23  | pilocarpine                                                                                                                                                                                                                                                                                                                       | 610        |
|                      | #24  | sucralfate                                                                                                                                                                                                                                                                                                                        | 769        |
|                      | #25  | zinc*                                                                                                                                                                                                                                                                                                                             | 4191       |
|                      | #26  | filgrastim                                                                                                                                                                                                                                                                                                                        | 784        |
|                      | #27  | #1 OR #2                                                                                                                                                                                                                                                                                                                          | 4104       |
|                      | #28  | #4 OR #5 OR #6 OR #7 OR #8                                                                                                                                                                                                                                                                                                        | 125571     |
|                      | #29  | #9 OR #10 OR #11 OR #12 OR #13 OR #14 OR #15 OR #16 OR #17 OR #18 OR #19 OR #20 OR #21 OR #22 OR #23 OR #24 OR #25                                                                                                                                                                                                                | 19956      |
|                      | #30  | #3 AND #27 AND #28 AND #29                                                                                                                                                                                                                                                                                                        | 199        |
| <b>ClinicalTrial</b> | #1   | (((((“mucositis” OR “stomatitis”)) AND (prevent* OR “prophylaxis”)) AND “chemotherapy”) AND (“amifostine” OR “chlorhexidine” OR “cryotherapy” OR “erythropoietin” OR “G-CSF” OR “GM-CSF” OR “glutamine” OR ice* OR “misoprostal” OR “palifermin” OR “pilocarpine” OR “sucralfate” OR zinc*)) AND (cancer* OR tumor* OR neoplasm*) | 11         |

**Table S2 Description of participants of included studies**

| Study ID | First Author (year)            | Type of cancer       | Details of cancer type                                                                                                                      | Chemotherapy regimens    | Detail of chemotherapy regimen                                                                                                               | Strength of chemotherapy | Intervention (N)                           | Treatment details                                                                                                                                                                        | Treatment duration (day) | Co-interventions                                                                   |
|----------|--------------------------------|----------------------|---------------------------------------------------------------------------------------------------------------------------------------------|--------------------------|----------------------------------------------------------------------------------------------------------------------------------------------|--------------------------|--------------------------------------------|------------------------------------------------------------------------------------------------------------------------------------------------------------------------------------------|--------------------------|------------------------------------------------------------------------------------|
| 1        | Ala (2016) <sup>1</sup>        | Solid cancer         | Gastric cancer, esophageal cancer and colorectal cancer                                                                                     | 5-FU based regimens      | 5-FU 600-1500 mg/cycle                                                                                                                       | high dose                | Sucralfate (n=26)<br>Placebo (n=26)        | Sucralfate mouthwash 10 ml q 6 hr<br>Non-Sucralfate mouthwash 10 ml q 6 hr                                                                                                               | 10                       | NA                                                                                 |
| 7        | Baydar (2005) <sup>2</sup>     | Solid cancer         | Colorectal cancer, stomach cancer, head of pancreas cancer, cecum cancer, sigmoid cancer, neuroendocrine cancer and metastatic liver cancer | 5-FU based regimens      | 5-FU 450 mgm <sup>2</sup>                                                                                                                    | usual dose               | Cryotherapy (n=45)<br>Control (n=54)       | Patients kept ice pieces in their mouth from the beginning of IV 5-FU until 10 min after the treatment<br>Control group don't do anything before IV 5-FU                                 | 21                       | Folinic acid 20 mgm <sup>2</sup> in 10 min and 30 min prior 5-FU administration    |
| 9        | Blijlevens (2013) <sup>3</sup> | Hematological cancer | Multiple myeloma                                                                                                                            | HDM regimens             | Melphalan 140-200 mgm <sup>2</sup>                                                                                                           | high dose                | Palifermin (n=115)<br>Placebo (n=57)       | Palifermin 60 mg/kg/day IV infusion pre-/post-HDM<br>Placebo IV                                                                                                                          | 6                        | NA                                                                                 |
| 10       | Bradstock (2014) <sup>4</sup>  | Hematological cancer | Acute myeloid leukemia                                                                                                                      | ICE regimens             | Idarubicin 9 mgm <sup>2</sup> on days 1-3, etoposide 75 mgm <sup>2</sup> on days 1-7, and cytarabine 3 gm <sup>2</sup> on days 1, 3, 5 and 7 | high dose                | Palifermin (n=79)<br>Placebo (n=81)        | Palifermin 60 mg/kg/day IV infusion before chemotherapy<br>Placebo IV infusion before chemotherapy                                                                                       | 6                        | Supportive treatment, e.g. filgrastim, red cell and platelet concentrates          |
| 13       | Cartee (1994) <sup>5</sup>     | Solid cancer         | Breast cancer                                                                                                                               | AFM regimens             | 5-FU 500 mg/kg/day on days 1-5, adriamycin 25 mgm <sup>2</sup> on day 3-5, MTX IV 250 mgm <sup>2</sup> on day 15                             | usual dose               | GM-CSF (n=36)<br>0.1% Albumin (n=9)        | GM-CSF 1 mcg/ml mouthwash 15 ml during the chemotherapy QID<br>0.1% albumin mouthwash 15 ml during the chemotherapy QID                                                                  | 21                       | G-CSF 5 mcg/kg/day SC on days 7-13 and from day 16 until resolution of neutropenia |
| 15       | Cascinu (1994) <sup>6</sup>    | Solid cancer         | Colon-rectum cancer, pancreas cancer, stomach cancer and prostate cancer                                                                    | 5-FU based regimens      | 5-FU 370-500 mgm <sup>2</sup>                                                                                                                | usual dose               | Cryotherapy (n=44)<br>Control (n=40)       | Patients placing ice chips in their mouths 5 min prior to each dose of 5-FU for a total 30 min<br>Control group don't do anything                                                        | 21                       | NA                                                                                 |
| 17       | Choi (2006) <sup>7</sup>       | Solid cancer         | Stomach cancer, esophageal cancer, colorectal cancer, head and neck cancer, periampullar cancer and biliary cancer                          | 5-FU/leucovorin regimens | Leucovorin 100 mgm <sup>2</sup> over 30 min followed 5-FU 500 mgm <sup>2</sup> continuous infusion for 5 days                                | usual dose               | Glutamine (n=22)<br>Supportive care (n=29) | Glutamine 30 g/day TID initiated 3 days before the inception of chemotherapy continued<br>Control group patients received supportive care before the inception of chemotherapy continued | 15                       | All patient received 30 min of oral cryotherapy QID during chemotherapy            |

| Study ID | First Author (year)                  | Type of cancer | Details of cancer type                                                                                                               | Chemotherapy regimens                                                                                                      | Detail of chemotherapy regimen                                                                                                                                                                                                                              | Strength of chemotherapy | Intervention (N)                             | Treatment details                                                                                                                                                                | Treatment duration (day) | Co-interventions                                                                                                                                                                                              |
|----------|--------------------------------------|----------------|--------------------------------------------------------------------------------------------------------------------------------------|----------------------------------------------------------------------------------------------------------------------------|-------------------------------------------------------------------------------------------------------------------------------------------------------------------------------------------------------------------------------------------------------------|--------------------------|----------------------------------------------|----------------------------------------------------------------------------------------------------------------------------------------------------------------------------------|--------------------------|---------------------------------------------------------------------------------------------------------------------------------------------------------------------------------------------------------------|
| 20       | Dazzi (2002) <sup>8</sup>            | Solid cancer   | Breast cancer, ewing's sarcoma, osteosarcoma, non-Hodgkin lymphoma, germ cell tumors, small-cell lung cancer and soft tissue sarcoma | Thiotepa and melphalan regimens<br>Mitoxantrone, thiotepa and cyclophosphamide regimens<br>Busulfan and melphalan regimens | Thiotepa 600 mg/m <sup>2</sup> and melphalan 140 mg/m <sup>2</sup><br>Mitoxantrone 40 mg/m <sup>2</sup> day1, thiotepa 500 mg/m <sup>2</sup> day 2, cyclophosphamide 100 mg/kg days 3-4<br>Busulfan 4 mg/kg days 1-4, melphalan 140 mg/m <sup>2</sup> day 5 | high dose                | GM-CSF (n=46)<br>Placebo (n=44)              | GM-CSF mouthwash 150 mcg/day in 100 cm <sup>3</sup> of sterile water QID<br>Sterile water 100 cm <sup>3</sup> QID                                                                | NA                       | 0.2% oral chlorhexidine and amphotericin B                                                                                                                                                                    |
| 21       | Dodd (1996) <sup>9</sup>             | Solid cancer   | Breast cancer, lung cancer and colon cancer                                                                                          | Doxorubicin, bleomycin, etoposide, 5-FU, MTX, paclitaxel or fludarabine                                                    | NA                                                                                                                                                                                                                                                          | NA                       | Chlorhexidine (n=112)<br>Placebo (n=110)     | Chlorhexidine mouth rinse for 30 second BID<br>Sterile water as placebo rinse for 30 second BID                                                                                  | 30                       | NA                                                                                                                                                                                                            |
| 22       | Duenas-Gonzalez (1996) <sup>10</sup> | Mixed cancer   | Hodgkin's lymphoma, non-Hodgkin lymphoma, breast cancer, soft tissue sarcoma, uterine-cervix cancer and testicular cancer            | ICE regimens                                                                                                               | Ifosfamide 10 gm <sup>2</sup> , carboplatin 1.5 gm <sup>2</sup> and etoposide 2.1 gm <sup>2</sup>                                                                                                                                                           | high dose                | Misoprostol (n=9)<br>Placebo (n=7)           | Misoprostol 250 mcg TID PO from the first day of chemotherapy until day post-transplantation<br>Placebo TID PO from the first day of chemotherapy until day post-transplantation | 21                       | Supportive care: ranitidine, ketoconazole, ciprofloxacin, ceftazidime plus amikacin after the first febrile episode and acyclovir 500 mg/m <sup>2</sup> /day if developed oral mucositis until lesions healed |
| 25       | Ferretti (1990) <sup>11</sup>        | Mixed cancer   | Leukemia, lymphoma, squamous cell carcinoma, rhabdomyosarcoma and lung cancer                                                        | High dose chemotherapy                                                                                                     | NA                                                                                                                                                                                                                                                          | high dose                | Chlorhexidine (n=19)<br>Placebo (n=21)       | 0.12% Chlorhexidine digluconate mouthwash 30 seconds TID<br>Non-chlorhexidine mouthwash 30 seconds TID                                                                           | 21                       | NA                                                                                                                                                                                                            |
| 27       | Hartmann (2001) <sup>12</sup>        | Solid cancer   | Breast cancer, testicular cancer, sarcoma and ovarian cancer                                                                         | VIC regimens                                                                                                               | Etoposide 500 mg/m <sup>2</sup> 4 hr/day, ifosfamide 4000 mg/m <sup>2</sup> 18 hr/day and carboplatin 500 mg/m <sup>2</sup> 18 hr/day for 3 days                                                                                                            | high dose                | Amifostine (n=20)<br>Control (n=20)          | Amifostine 910 mg/m <sup>2</sup> as a 15 minutes IV infusion before chemotherapy<br>Pretreatment without amifostine                                                              | 3                        | Supportive treatment, e.g. ofloxacin, fluconazole, transfuse red blood cell and platelet, G-CSF                                                                                                               |
| 29       | Heydari (2012) <sup>13</sup>         | Solid cancer   | Breast cancer and colorectal cancer                                                                                                  | 5-FU based regimens                                                                                                        | MAYO regimen: 5-FU 425 mg/m <sup>2</sup> and leucovorin 25 mg/m <sup>2</sup> for days<br>CAF regimen: cyclophosphamide 500 mg/m <sup>2</sup> , adriamycin 50                                                                                                | usual dose               | Cryotherapy (n=40)<br>No intervention (n=40) | Application of ice chips in the mouthwash for 5 minutes before chemotherapy to 5 minutes after chemotherapy<br>Control group received no intervention                            | 21                       | NA                                                                                                                                                                                                            |

| Study ID | First Author (year)             | Type of cancer       | Details of cancer type                                                                | Chemotherapy regimens            | Detail of chemotherapy regimen                                                                                                                                                                                                | Strength of chemotherapy | Intervention (N)                           | Treatment details                                                                                                                                                           | Treatment duration (day) | Co-interventions                                                                                                                                                      |
|----------|---------------------------------|----------------------|---------------------------------------------------------------------------------------|----------------------------------|-------------------------------------------------------------------------------------------------------------------------------------------------------------------------------------------------------------------------------|--------------------------|--------------------------------------------|-----------------------------------------------------------------------------------------------------------------------------------------------------------------------------|--------------------------|-----------------------------------------------------------------------------------------------------------------------------------------------------------------------|
|          |                                 |                      |                                                                                       |                                  | mgm <sup>2</sup> and 5-FU 500 mgm <sup>2</sup> for the first day of the cycle<br>CMF regimen:<br>cyclophosphamide 600 mgm <sup>2</sup> , MTX 40 mgm <sup>2</sup> and 5-FU 600 mgm <sup>2</sup> for the first day of the cycle |                          |                                            |                                                                                                                                                                             |                          |                                                                                                                                                                       |
| 35       | Karagozolu (2004) <sup>14</sup> | Solid cancer         | Epidermoid cancer, small cell cancer, adenocarcinoma and mesothelioma                 | Etoposide and cisplatin regimens | Etoposide, cisplatin, mitomycin (Mitomycin-C) and vinblastin                                                                                                                                                                  | NA                       | Cryotherapy (n=30)<br>Control (n=30)       | Oral cryotherapy before chemotherapy 5 minutes mouthwash and maintained infusion chemotherapy<br>Control group received no intervention                                     | 21                       | NA                                                                                                                                                                    |
| 38       | Katranci (2012) <sup>15</sup>   | Solid cancer         | Gastric cancer, colorectal cancer and pancreatic cancer                               | 5-FU/leucovorin regimens         | 5-FU and leucovorin                                                                                                                                                                                                           | NA                       | Cryotherapy (n=30)<br>Control (n=30)       | Cryotherapy 5 minutes mouthwash before treatment, during treatment, and within 15 minutes after treatment for a total of 30 minutes<br>Control group receiving routine care | 5                        | NA                                                                                                                                                                    |
| 41       | Lilleby (2006) <sup>16</sup>    | Hematological cancer | Multiple myeloma                                                                      | HDM regimens                     | Melphalan 200 mgm <sup>2</sup>                                                                                                                                                                                                | high dose                | Cryotherapy (n=21)<br>Normal saline (n=19) | Cryotherapy in mouthwash 30 minutes before, during and after received chemotherapy<br>Normal saline rinses before, during and after received chemotherapy                   | 2                        | NA                                                                                                                                                                    |
| 46       | Mahood (1991) <sup>17</sup>     | Solid cancer         | Colon cancer                                                                          | 5-FU/leucovorin regimens         | 5-FU 425 mgm <sup>2</sup> /day and leucovorin 20 mgm <sup>2</sup> /day for 5 days                                                                                                                                             | usual dose               | Cryotherapy (n=50)<br>Control (n=45)       | Cryotherapy in mouths 5 minutes mouthwash prior to each dose of 5-FU and for a total of 30 minutes<br>Control group received no intervention                                | 5                        | NA                                                                                                                                                                    |
| 47       | Mansouri (2012) <sup>18</sup>   | Hematological cancer | Acute myeloid leukemia, acute lymphoblastic leukemia and chronic myelogenous leukemia | Busulfan based regimens          | Busulfan 16 mg/kg for 4 days followed by cyclophosphamide 60 mg/kg daily for 2 days<br>Fludarabine 30 mgm <sup>2</sup> /day for 5 days plus busulfan 14 mg/kg for 4 days                                                      | high dose                | Zinc sulfate (n=30)<br>Placebo (n=30)      | Zinc sulfate capsule 220 mg PO twice a day<br>Placebo capsule PO twice a day                                                                                                | 6-9                      | Nystatin q 3 hr, chewable tablet sucralfate 500 mg q 8 hr, chlorhexidine 0.02% mouthwash 10 ml, diluted vial of amphotericin and diluted povidone iodine 10 ml q 3 hr |

| Study ID | First Author (year)           | Type of cancer       | Details of cancer type                                                                                               | Chemotherapy regimens                                                    | Detail of chemotherapy regimen                                                                                                                                                            | Strength of chemotherapy | Intervention (N)                                             | Treatment details                                                                                                                                   | Treatment duration (day) | Co-interventions                                                         |
|----------|-------------------------------|----------------------|----------------------------------------------------------------------------------------------------------------------|--------------------------------------------------------------------------|-------------------------------------------------------------------------------------------------------------------------------------------------------------------------------------------|--------------------------|--------------------------------------------------------------|-----------------------------------------------------------------------------------------------------------------------------------------------------|--------------------------|--------------------------------------------------------------------------|
| 48       | McGaw (1985) <sup>19</sup>    | Hematological cancer | Acute myeloblastic leukemia                                                                                          | Cytosine-arabioside (cytarabine), adriamycin (doxorubicin) and amsacrine | Cytosine-arabioside (cytarabine) 200 mg/m <sup>2</sup> /day for 5 days, adriamycin (doxorubicin) 40 mg/m <sup>2</sup> day 1 and day 2 and amsacrine 100 mg/m <sup>2</sup> /day for 5 days | high dose                | Chlorhexidine (n=8)<br>Control (n=8)                         | 0.1% chlorhexidine gluconate 10 ml mouthwash twice daily for 2 minutes<br>Placebo solution is 0.1% quinine chloride                                 | 5                        | NA                                                                       |
| 50       | Meropol (2003) <sup>20</sup>  | Solid cancer         | Colorectal cancer                                                                                                    | 5-FU/leucovorin regimens                                                 | Leucovorin 20 mg/m <sup>2</sup> , followed by 5-FU 425 mg/m <sup>2</sup> for 5 days                                                                                                       | usual dose               | KGF (n=54)<br>Placebo (n=27)                                 | KGF 1-80 g/kg/day IV bolus on days 1-3 of each cycle before chemotherapy<br>Placebo IV on days 1-3 of each cycle before chemotherapy                | 3                        | NA                                                                       |
| 53       | Nottage (2003) <sup>21</sup>  | Solid cancer         | Colorectal cancer                                                                                                    | 5-FU/leucovorin regimens                                                 | 5-FU 370-425 mg/m <sup>2</sup> /day and leucovorin 20-200 mg/m <sup>2</sup> /day                                                                                                          | usual dose               | Sucralfate (n=41)<br>Placebo (n=40)                          | Sucralfate mouthwash 10 ml for 2 minutes daily<br>Placebo mouthwash 10 ml for 2 minutes daily                                                       | 15                       | Oral cryotherapy immediately prior to the administration of chemotherapy |
| 55       | Okuno (1999) <sup>22</sup>    | Solid cancer         | NA                                                                                                                   | 5-FU based regimens                                                      | 5-FU 370-450 mg/m <sup>2</sup> /day                                                                                                                                                       | usual dose               | Glutamine (n=66)<br>Placebo (n=68)                           | Glutamine 4 g PO twice daily for 14 days<br>Placebo PO twice daily for 14 days                                                                      | 14                       | Oral cryotherapy 5 minutes before each 5-FU administration               |
| 56       | Papadeas (2007) <sup>23</sup> | Solid cancer         | Colorectal cancer and breast cancer                                                                                  | 5-FU/leucovorin regimens                                                 | Leucovorin 20 mg/m <sup>2</sup> /day plus 5-FU 600 mg/m <sup>2</sup> /day for 5 days                                                                                                      | usual dose               | Cryotherapy (n=36)<br>Placebo (n=40)                         | Cryotherapy swish around in oral cavity 5 minutes before, during and until 30 minutes after 5-FU administration<br>No intervention in placebo group | 5                        | NA                                                                       |
| 61       | Pitten (2003) <sup>24</sup>   | Mixed cancer         | Leukaemias, lymphoma, multiplemyeloma, gemcell cancer, ewing's sarcoma, neuroectodermal cancer and renal cell cancer | NA                                                                       | NA                                                                                                                                                                                        | NA                       | Chlorhexidine (n=24)<br>Placebo (n=23)                       | Chlorhexidine mouthwash three times a day (30 minutes after the meals)<br>Placebo mouthwash three times a day                                       | NA                       | Amphotericin B                                                           |
| 64       | Rosen (2006) <sup>25</sup>    | Solid cancer         | Colorectal cancer                                                                                                    | 5-FU/leucovorin regimens                                                 | Leucovorin 20 mg/m <sup>2</sup> /day followed by 5-FU 425 mg/m <sup>2</sup> /day for 5 days                                                                                               | usual dose               | Palifermin (n=36)<br>Placebo (n=28)                          | Palifermin 40 mg/kg IV for 3 consecutive days before chemotherapy<br>Placebo IV for 3 consecutive days before chemotherapy                          | 3                        | NA                                                                       |
| 70       | Sorensen (2008) <sup>26</sup> | Solid cancer         | Gastric cancer and colorectal cancer                                                                                 | 5-FU/leucovorin regimens                                                 | Leucovorin 20 mg/m <sup>2</sup> followed by 5-FU 425                                                                                                                                      | usual dose               | Chlorhexidine (n=75)<br>Placebo (n=75)<br>Cryotherapy (n=75) | Chlorhexidine 0.1% mouthwash 10 mL and the patients swirled it around in the mouth for 1 minute 3 times a day                                       | 21                       | NA                                                                       |

| Study ID | First Author (year)              | Type of cancer       | Details of cancer type | Chemotherapy regimens        | Detail of chemotherapy regimen                                                                                                                                                                                                                                                                                      | Strength of chemotherapy | Intervention (N)                    | Treatment details                                                                                                      | Treatment duration (day) | Co-interventions                                                                                                                                                  |
|----------|----------------------------------|----------------------|------------------------|------------------------------|---------------------------------------------------------------------------------------------------------------------------------------------------------------------------------------------------------------------------------------------------------------------------------------------------------------------|--------------------------|-------------------------------------|------------------------------------------------------------------------------------------------------------------------|--------------------------|-------------------------------------------------------------------------------------------------------------------------------------------------------------------|
|          |                                  |                      |                        |                              | mgm <sup>2</sup> daily in 5 days every 4 weeks                                                                                                                                                                                                                                                                      |                          |                                     | Cryotherapy with crushed ice in the mouth from 10 minutes before until 35 minutes after the start of each chemotherapy |                          |                                                                                                                                                                   |
| 72       | Spencer (2005) <sup>27</sup>     | Hematological cancer | Multiple myeloma       | HDM regimens                 | Melphalan 200 mgm <sup>2</sup>                                                                                                                                                                                                                                                                                      | high dose                | Amifostine (n=43)<br>Control (n=47) | Amifostine 910 mgm <sup>2</sup> continuous infusion over 15 minutes<br>Non-amifostine                                  | 1                        | Interferon alpha-2b,<br>Ciprofloxacin 500 mg BID 2 days, Norfloxacin 400 mg BID 2 days, Fluconazole 100 mg BID, Dexamethasone 20 mg 5HT3 antagonist 30-60 minutes |
| 73       | Tanaka (2016) <sup>28</sup>      | Solid cancer         | Esophageal cancer      | DCF regimens<br>DGS regimens | DCF regimens: docetaxel 35 mgm <sup>2</sup> , cisplatin 40 mgm <sup>2</sup> on days 1 and 15, 5-FU 400 mgm <sup>2</sup> on days 1-5 and 15-19 of q 28-day cycle<br>DGS regimens: docetaxel 35 mgm <sup>2</sup> , nedaplatin 40 mgm <sup>2</sup> on day 7 and S-1 80 mgm <sup>2</sup> on days 1-14 of q 28-day cycle | high dose                | Glutamine (n=10)<br>Control (n=10)  | Glutamine 8910 mg PO daily<br>Non-glutamine 8910 mg PO daily                                                           | 26                       | NA                                                                                                                                                                |
| 80       | Vadhan- Raj (2010) <sup>29</sup> | Solid cancer         | Sarcoma                | Doxorubicin-based regimen    | Doxorubicin 90 mgm <sup>2</sup> 72 hr and Ifosfamide 10 gm <sup>2</sup> 4 days, Cisplatin 120 mgm <sup>2</sup><br>Doxorubicin 90 mgm <sup>2</sup> and cisplatin 120 mgm <sup>2</sup>                                                                                                                                | high dose                | Palifermin (n=32)<br>Placebo (n=16) | Palifermin 180 mg/kg IV 3 days before chemotherapy<br>Placebo IV 3 days before chemotherapy                            | 3                        | NA                                                                                                                                                                |

**Abbreviations:** NA, Not available; HDM regimens, High dose melphalan; ICE regimens, Idarubicin-cytarbine-etoposide or Ifosfamide-carboplastin-etoposide; AFM regimens, Adriamycin (doxorubicin)+5-FU+MTX; DCF regimens, Docetaxel+cisplatin+5-FU; DGS regimens; Docetaxel+nedaplatin+S-1; VIC regimens, High dose etoposide+ifosfamide+carboplastin



**Figure S1 Summarized risk of bias of included randomized control trials.**

|                      | Random sequence generation (selection bias) | Allocation concealment (selection bias) | Blinding of participants and personnel (performance bias) | Blinding of outcome assessment (detection bias) | Incomplete outcome data (attrition bias) | Selective reporting (reporting bias) |
|----------------------|---------------------------------------------|-----------------------------------------|-----------------------------------------------------------|-------------------------------------------------|------------------------------------------|--------------------------------------|
| Ala 2016             | +                                           | +                                       | +                                                         | +                                               | +                                        | +                                    |
| Baydar 2005          | ?                                           | ?                                       | -                                                         | ?                                               | +                                        | +                                    |
| Blijlevens 2013      | ?                                           | +                                       | +                                                         | +                                               | +                                        | +                                    |
| Bradstock 2014       | ?                                           | ?                                       | +                                                         | +                                               | +                                        | +                                    |
| Cartee 1994          | ?                                           | +                                       | +                                                         | +                                               | +                                        | +                                    |
| Cascinu 1994         | ?                                           | ?                                       | -                                                         | ?                                               | +                                        | +                                    |
| Choi 2006            | +                                           | ?                                       | -                                                         | -                                               | +                                        | +                                    |
| Dazzi 2002           | ?                                           | ?                                       | +                                                         | +                                               | +                                        | +                                    |
| Dodd 1996            | ?                                           | ?                                       | -                                                         | +                                               | +                                        | +                                    |
| Duenas-Gonzalez 1996 | ?                                           | ?                                       | +                                                         | +                                               | +                                        | +                                    |
| Ferretti 1990        | ?                                           | ?                                       | -                                                         | +                                               | +                                        | +                                    |
| Hartmann 2001        | ?                                           | ?                                       | -                                                         | ?                                               | +                                        | +                                    |
| Heydari 2012         | +                                           | ?                                       | -                                                         | ?                                               | +                                        | +                                    |
| Karagozoglul 2004    | ?                                           | ?                                       | -                                                         | ?                                               | +                                        | +                                    |
| Katrancl 2012        | +                                           | ?                                       | -                                                         | ?                                               | +                                        | +                                    |
| Lilleby 2006         | ?                                           | ?                                       | -                                                         | ?                                               | +                                        | +                                    |
| Mahood 1991          | ?                                           | ?                                       | -                                                         | ?                                               | ?                                        | +                                    |
| Mansouri 2012        | +                                           | +                                       | +                                                         | +                                               | +                                        | +                                    |
| McGaw 1985           | ?                                           | ?                                       | -                                                         | +                                               | +                                        | +                                    |
| Meropol 2003         | ?                                           | ?                                       | +                                                         | +                                               | +                                        | +                                    |
| Nottage 2003         | ?                                           | ?                                       | +                                                         | +                                               | +                                        | +                                    |
| Okuno 1999           | ?                                           | ?                                       | +                                                         | +                                               | +                                        | +                                    |
| Papadeas 2007        | -                                           | -                                       | -                                                         | +                                               | +                                        | +                                    |
| Pitten 2003          | ?                                           | +                                       | -                                                         | +                                               | +                                        | +                                    |
| Rosen 2006           | ?                                           | ?                                       | +                                                         | ?                                               | ?                                        | +                                    |
| Sorensen 2008        | ?                                           | +                                       | -                                                         | ?                                               | ?                                        | +                                    |
| Spencer 2005         | ?                                           | ?                                       | -                                                         | -                                               | +                                        | +                                    |
| Tanaka 2016          | ?                                           | ?                                       | ?                                                         | +                                               | +                                        | +                                    |
| Vadhan-Raj 2010      | +                                           | +                                       | +                                                         | +                                               | +                                        | +                                    |

This report followed the recommended approach for assessing risk of bias in twenty-nine randomized control trials included in Cochrane reviews. This tool addresses specific bias domains including methods for generating the random sequence, allocation concealment, blinding of participants and investigators, blinding of outcome assessment, incompleteness of outcome data and selective outcome reporting. Each item is adjudicated within each study and the results are represented in a risk of bias table. The adjudication of the risk of bias is achieved by answering pre-specified questions about the methods reported by each study in relation to the risk domain, such that the conclusion is either low risk of bias, unclear risk of bias or high risk of bias.

**Figure S2 Risk of bias graph: review authors' judgements (Low, Unclear and High) about each risk of bias item presented as percentages across all included studies.**

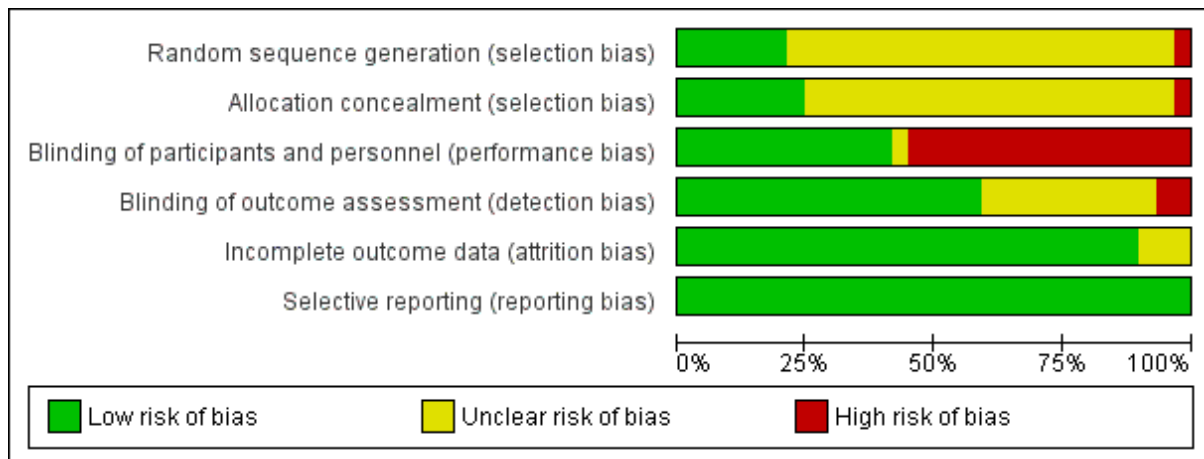

We found the overall quality of studies to be good, although most of the studies did not report the details about the method of random sequence generation and allocation concealment

**Table S3 Pairwise meta-analysis risk ratio (95% CI) for all dichotomous outcome**

| Comparisons                                |     | No. studies | No. of events/<br>Total No. of<br>Treatment 1 | No. of events/<br>Total No. of<br>Treatment 2 | Pairwise<br>meta-analysis<br>risk ratio (95% CI) | Heterogeneity I <sup>2</sup><br>(variation in RR<br>attributable to<br>heterogeneity) |
|--------------------------------------------|-----|-------------|-----------------------------------------------|-----------------------------------------------|--------------------------------------------------|---------------------------------------------------------------------------------------|
| <b>Any grade mucositis</b>                 |     |             |                                               |                                               |                                                  |                                                                                       |
| AMI vs.                                    | CTL | 2           | 39/63                                         | 53/67                                         | 0.75 (0.43, 1.30)                                | 49.4%                                                                                 |
| CHL vs.                                    | CRY | 1           | 34/75                                         | 39/75                                         | 0.87 (0.63, 1.21)                                | NA                                                                                    |
|                                            | CTL | 5           | 79/238                                        | 91/237                                        | 0.85 (0.56, 1.30)                                | 46.2%                                                                                 |
| CRY vs.                                    | CTL | 9           | 118/371                                       | 226/373                                       | 0.52 (0.41, 0.66)                                | 48.4%                                                                                 |
| GLU vs.                                    | CTL | 3           | 60/98                                         | 72/107                                        | 0.84 (0.47, 1.47)                                | 77.1%                                                                                 |
| GMCSF vs.                                  | CTL | 2           | 55/82                                         | 44/53                                         | 1.11 (0.48, 2.57)                                | 53.4%                                                                                 |
| MIS vs.                                    | CTL | 1           | 8/9                                           | 2/7                                           | 3.11 (0.94, 10.27)                               | NA                                                                                    |
| PFM vs.                                    | CTL | 5           | 175/305                                       | 161/215                                       | 0.72 (0.54, 0.96)                                | 76.1%                                                                                 |
| SUC vs.                                    | CTL | 2           | 19/67                                         | 37/66                                         | 0.51 (0.12, 2.17)                                | 89.1%                                                                                 |
| ZIN vs.                                    | CTL | 1           | 25/30                                         | 23/30                                         | 1.09 (0.84, 1.40)                                | NA                                                                                    |
| <b>Mild-moderate mucositis (grade 1-2)</b> |     |             |                                               |                                               |                                                  |                                                                                       |
| AMI vs.                                    | CTL | 1           | 29/43                                         | 27/47                                         | 1.17 (0.85, 1.62)                                | NA                                                                                    |
| CHL vs.                                    | CTL | 1           | 30/75                                         | 28/75                                         | 1.07 (0.72, 1.60)                                | NA                                                                                    |
| CRY vs.                                    | CTL | 8           | 86/341                                        | 130/343                                       | 0.65 (0.43, 0.96)                                | 60.4%                                                                                 |
|                                            | CHL | 1           | 27/75                                         | 30/75                                         | 0.90 (0.60, 1.36)                                | NA                                                                                    |
| GLU vs.                                    | CTL | 3           | 54/98                                         | 59/107                                        | 0.95 (0.54, 1.65)                                | 60.9%                                                                                 |
| GMCSF vs.                                  | CTL | 1           | 25/46                                         | 25/44                                         | 0.96 (0.66, 1.38)                                | NA                                                                                    |
| PFM vs.                                    | CTL | 4           | 114/251                                       | 113/188                                       | 0.80 (0.67, 0.96)                                | 0.00%                                                                                 |
| SUC vs.                                    | CTL | 2           | 12/67                                         | 24/66                                         | 0.41 (0.08, 2.02)                                | 76.2%                                                                                 |
| ZIN vs.                                    | CTL | 1           | 18/30                                         | 15/30                                         | 1.20 (0.76, 1.90)                                | NA                                                                                    |
| <b>Severe mucositis (grade 3-4)</b>        |     |             |                                               |                                               |                                                  |                                                                                       |
| AMI vs.                                    | CTL | 2           | 10/63                                         | 26/67                                         | 0.42 (0.22, 0.78)                                | 0.0%                                                                                  |
| CHL vs.                                    | CRY | 1           | 7/75                                          | 9/75                                          | 0.78 (0.31, 1.98)                                | NA                                                                                    |
|                                            | CTL | 2           | 11/83                                         | 25/83                                         | 0.44 (0.23, 0.83)                                | 0.0%                                                                                  |
| CRY vs.                                    | CTL | 5           | 29/230                                        | 75/219                                        | 0.38 (0.26, 0.56)                                | 0.0%                                                                                  |
| GLU vs.                                    | CTL | 3           | 6/98                                          | 13/107                                        | 0.56 (0.21, 1.47)                                | 0.0%                                                                                  |
| GMCSF vs.                                  | CTL | 2           | 30/82                                         | 19/53                                         | 1.02 (0.52, 1.99)                                | 22.1%                                                                                 |
| PFM vs.                                    | CTL | 5           | 61/305                                        | 48/215                                        | 0.56 (0.30, 1.05)                                | 53.4%                                                                                 |
| SUC vs.                                    | CTL | 1           | 4/26                                          | 13/26                                         | 0.31 (0.12, 0.82)                                | NA                                                                                    |
| ZIN vs.                                    | CTL | 1           | 7/30                                          | 8/30                                          | 0.88 (0.36, 2.11)                                | NA                                                                                    |
| <b>Taste disturbance</b>                   |     |             |                                               |                                               |                                                  |                                                                                       |
| CHL vs.                                    | CRY | 1           | 24/75                                         | 35/75                                         | 0.69 (0.46, 1.03)                                | NA                                                                                    |
|                                            | CTL | 1           | 35/75                                         | 25/75                                         | 1.40 (0.94, 2.09)                                | NA                                                                                    |
| CRY vs.                                    | CTL | 1           | 24/75                                         | 25/75                                         | 0.96 (0.61, 1.52)                                | NA                                                                                    |
| GLU vs.                                    | CTL | 1           | 1/10                                          | 3/10                                          | 0.33 (0.04, 2.69)                                | NA                                                                                    |
| PFM vs.                                    | CTL | 3           | 30/114                                        | 6/79                                          | 2.94 (1.30, 6.66)                                | 0.0%                                                                                  |
| <b>Gastrointestinal adverse events</b>     |     |             |                                               |                                               |                                                  |                                                                                       |
| AMI vs.                                    | CTL | 1           | 5/20                                          | 10/20                                         | 0.50 (0.21, 1.20)                                | NA                                                                                    |
| GLU vs.                                    | CTL | 1           | 4/10                                          | 4/10                                          | 1.00 (0.34, 2.93)                                | NA                                                                                    |
| MIS vs.                                    | CTL | 1           | 3/9                                           | 4/7                                           | 0.58 (0.19, 1.80)                                | NA                                                                                    |
| PFM vs.                                    | CTL | 4           | 113/190                                       | 97/158                                        | 0.98 (0.86, 1.10)                                | 0.0%                                                                                  |
| SUC vs.                                    | CTL | 1           | 16/41                                         | 14/40                                         | 1.11 (0.63, 1.97)                                | NA                                                                                    |
| <b>Skin reaction adverse events</b>        |     |             |                                               |                                               |                                                  |                                                                                       |
| PFM vs.                                    | CTL | 4           | 78/273                                        | 40/199                                        | 1.32 (0.74, 2.34)                                | 56.4%                                                                                 |

**Abbreviations:** NA, Not available; AMI, Amifostine; CHL, Chlorhexidine; CRY, Cryotherapy; GLU, Glutamine; GM-CSF, Granulocyte macrophage colony-stimulating factor; MIS, Misoprostol; PFM, Palifermin; SUC, Sucralfate; ZIN, Zinc sulfate; CTL, Control

**Table S4 Assessment of loop inconsistency in networks**

| Closed triangular or quadratic loop of evidence | Inconsistency factor<br>(95% confidence interval) | P value | Loop heterogeneity tau <sup>2</sup> |
|-------------------------------------------------|---------------------------------------------------|---------|-------------------------------------|
| <b>Any grade mucositis</b>                      |                                                   |         |                                     |
| CTL-CHL-CRY                                     | 0.30 (0.00, 0.87)                                 | 0.301   | 0.000                               |
| <b>Mild to moderate mucositis (grade 1-2)</b>   |                                                   |         |                                     |
| CTL-CHL-CRY                                     | 0.49 (0.00, 2.14)                                 | 0.557   | 0.235                               |
| <b>Severe mucositis (grade 3-4)</b>             |                                                   |         |                                     |
| CTL-CHL-CRY                                     | 0.13 (0.00, 1.34)                                 | 0.833   | 0.000                               |

**Table S5 Assessment of global inconsistency in networks using 'design-by-treatment' interaction model**

| Network outcome                        | Chi-square | P value for test of global inconsistency |
|----------------------------------------|------------|------------------------------------------|
| Mucositis any grade                    | 1.28       | 0.526                                    |
| Mild to moderate mucositis (grade 1-2) | 1.25       | 0.264                                    |
| Severe mucositis (grade 3-4)           | 0.07       | 0.966                                    |
| Taste disturbance                      | 6.69       | 0.009                                    |
| Gastrointestinal adverse events        | 0.14       | 0.708                                    |
| Skin reaction adverse events           | 0.91       | 0.341                                    |

**Figure S3 SUCRA ranking curve of treatment options for any grade mucositis**

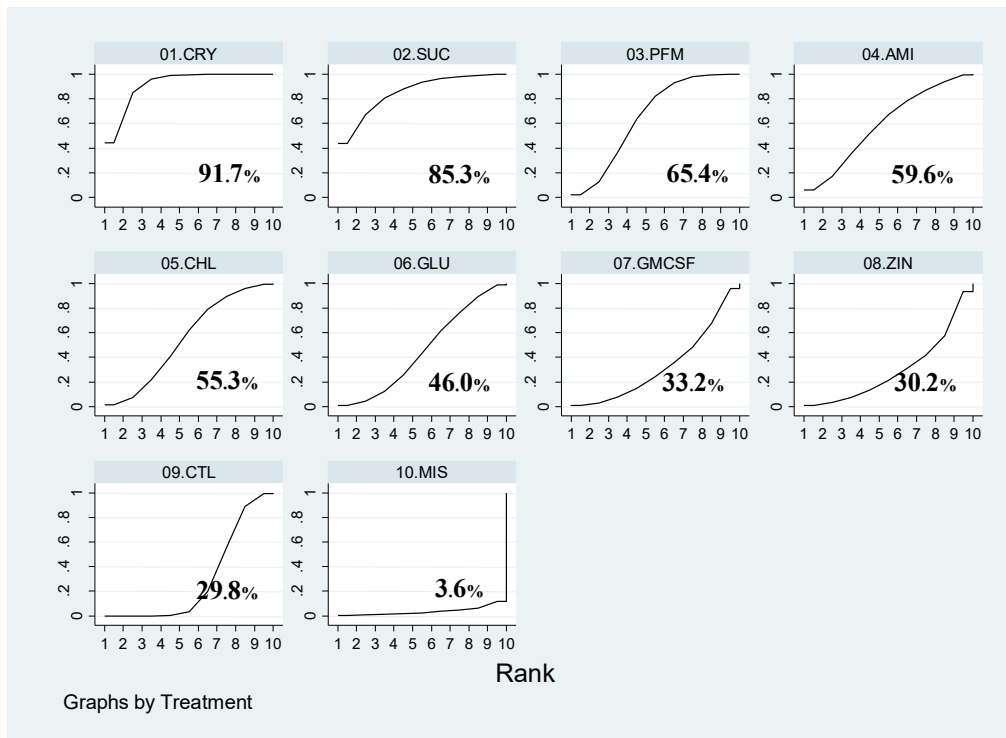

**Abbreviations:** AMI, Amifostine; CRY, Cryotherapy; CHL, Chlorhexidine; GLU, Glutamine; GM-CSF, Granulocyte-macrophage colony-stimulating factor; MIS, Misoprostol; PFM, Palifermin; SUC, Sucralfate; ZIN, Zinc sulfate; CTL, Control

**Figure S4 SUCRA ranking curve of treatment options for mild to moderate mucositis (grade 1-2)**

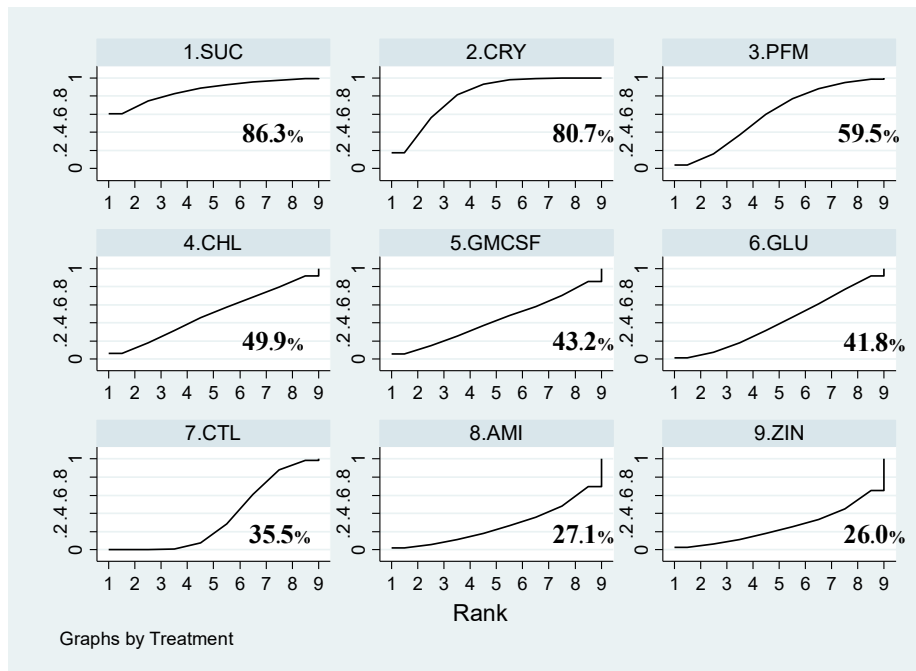

**Abbreviations:** AMI, Amifostine; CRY, Cryotherapy; CHL, Chlorhexidine; GLU, Glutamine; GM-CSF, Granulocyte-macrophage colony-stimulating factor; PFM, Palifermin; SUC, Sucralfate; ZIN, Zinc sulfate; CTL, Control

**Figure S5 SUCRA ranking curve of treatment options for severe mucositis (grade 3-4)**

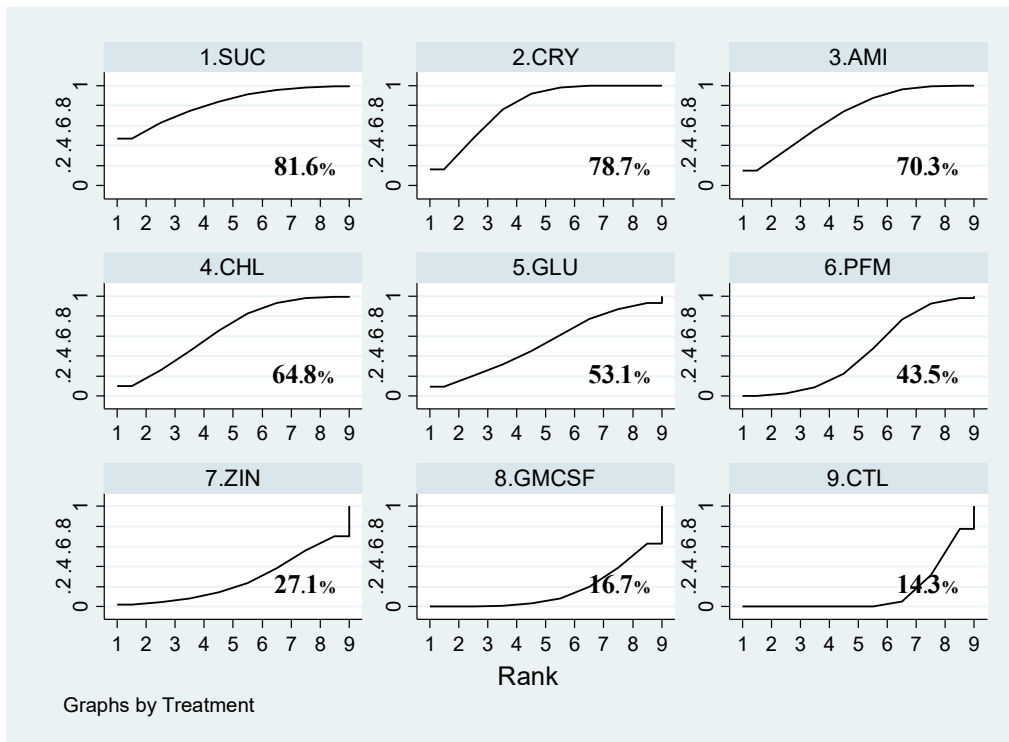

**Abbreviations:** AMI, Amifostine; CRY, Cryotherapy; CHL, Chlorhexidine; GLU, Glutamine; GM-CSF, Granulocyte-macrophage colony-stimulating factor; PFM, Palifermin; SUC, Sucralfate; ZIN, Zinc sulfate; CTL, Control

**eFigure S6 SUCRA ranking curve of taste disturbance**

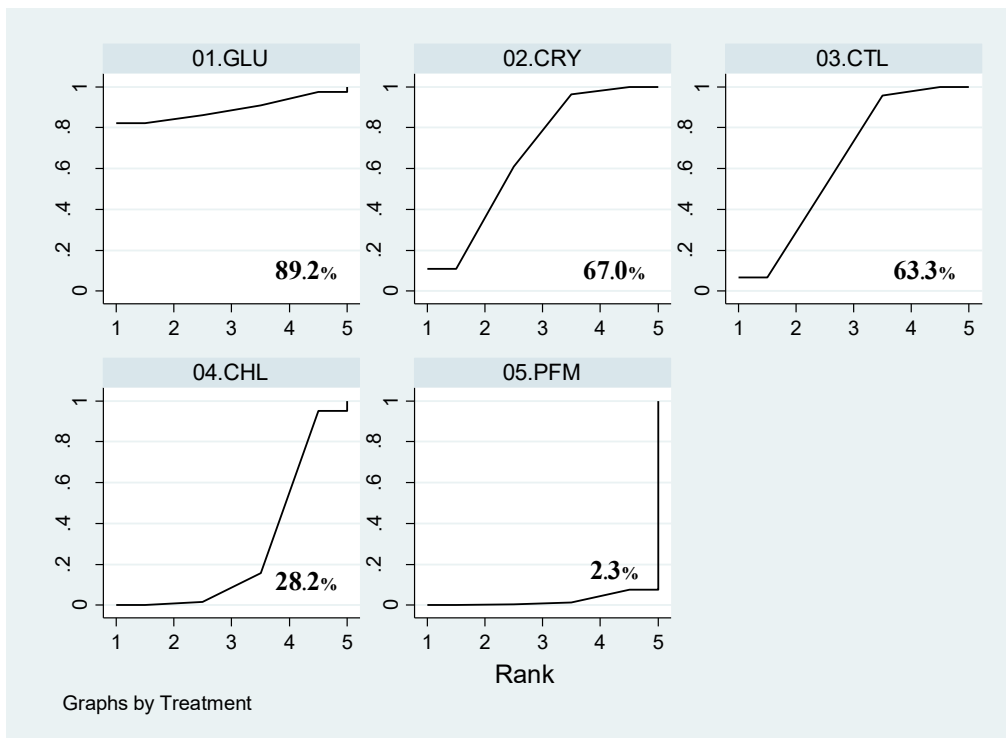

**Abbreviations:** CRY, Cryotherapy; CHL, Chlorhexidine; GLU, Glutamine; PFM, Palifermin; CTL, Control

**Figure S7 SUCRA ranking curve of gastrointestinal adverse events**

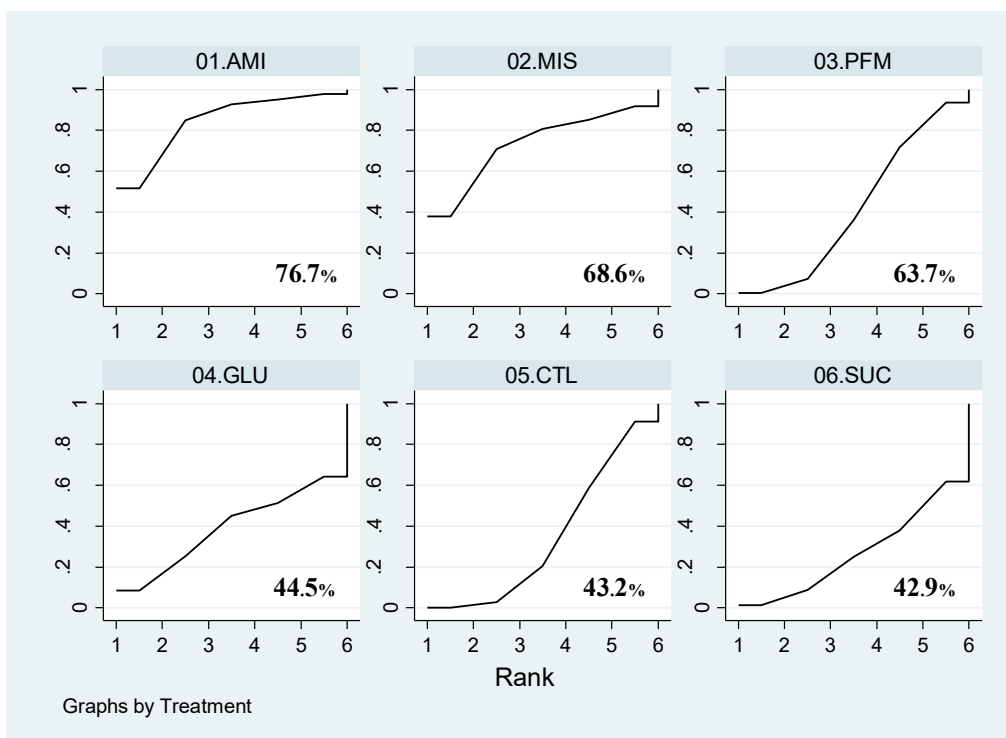

**Abbreviations:** AMI, Amifostine; GLU, Glutamine; MIS, Misoprostol; PFM, Palifermin; SUC, Sucralfate; CTL, Control



**Figure S8 SUCRA ranking curve of skin reaction adverse events**

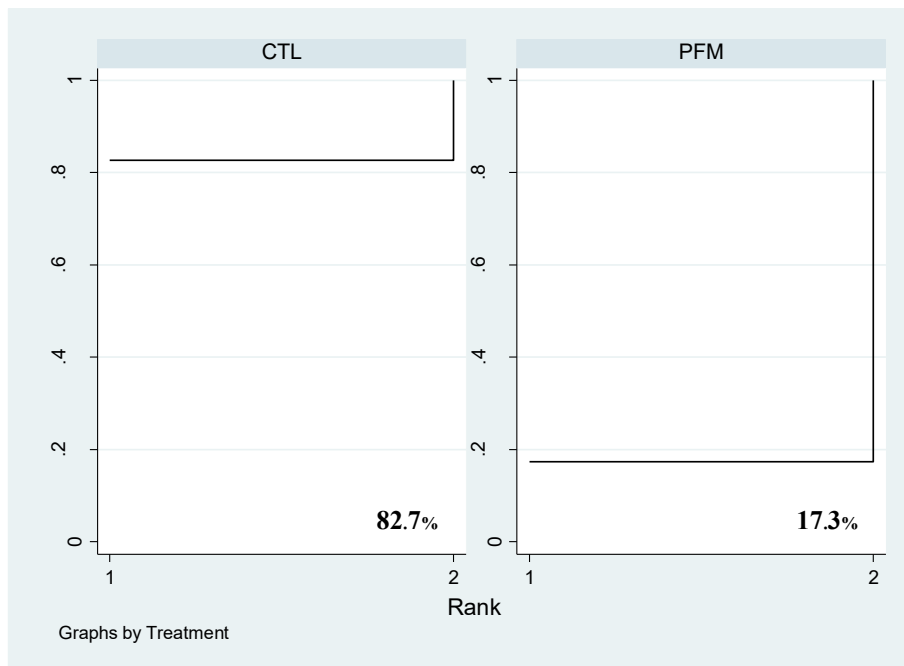

**Abbreviations:** PFM, Palifermin; CTL, Control

**Table S5 Subgroup analyses for preventing chemotherapy induced oral mucositis in adult cancer patients**

The following table shows the effect sizes (risk ratio) and the rank order (SUCRA ranks) compared to control before (standard analysis) and after subgroup analyses.

| Treatment name                           | Standard analysis     | SUCRA rank | Hematological cancer | SUCRA rank | Solid cancer         | SUCRA rank | Mixed cancer          | SUCRA rank | 5FU regimen          | SUCRA rank | N5FU regimen          | SUCRA rank | AMET regimen         | SUCRA rank | NAMET regimen         | SUCRA rank | High dose regimen     | SUCRA rank | Usual dose regimen   | SUCRA rank |
|------------------------------------------|-----------------------|------------|----------------------|------------|----------------------|------------|-----------------------|------------|----------------------|------------|-----------------------|------------|----------------------|------------|-----------------------|------------|-----------------------|------------|----------------------|------------|
| CRY                                      | 0.51<br>(.038, 0.68)  | 1          | 0.63<br>(.045, 0.88) | 1          | 0.49<br>(.037, 0.65) | 1          | NA                    |            | 0.49<br>(.032, 0.73) | 1          | 0.46<br>(.022, 0.97)  | 1          | 0.49<br>(.034, 0.71) | 1          | 0.43<br>(.017, 1.07)  | 1          | 0.63<br>(.032, 1.23)  | 3          | 0.55<br>(.040, 0.75) | 1          |
| SUC                                      | 0.52<br>(.027, 0.99)  | 2          | NA                   |            | 0.51<br>(.012, 2.17) | 2          | NA                    |            | 0.52<br>(.024, 1.11) | 2          | NA                    |            | 0.52<br>(.026, 1.04) | 2          | NA                    |            | 0.24<br>(.010, 0.60)  | 1          | 1.06<br>(.047, 2.38) | 5          |
| PFM                                      | 0.72<br>(.051, 0.99)  | 3          | 0.87<br>(.059, 1.27) | 3          | 0.58<br>(.045, 0.76) | 4          | NA                    |            | 0.64<br>(.031, 1.34) | 3          | 0.74<br>(.047, 1.18)  | 2          | 0.67<br>(.041, 1.10) | 4          | 0.74<br>(.035, 1.58)  | 3          | 0.75<br>(.052, 1.09)  | 4          | 0.46<br>(.038, 1.08) | 2          |
| AMI                                      | 0.75<br>(.043, 1.31)  | 4          | 0.86<br>(.072, 1.03) | 4          | 0.50<br>(.021, 1.20) | 3          | NA                    |            | NA                   |            | 0.73<br>(.038, 1.40)  | 3          | NA                   |            | 0.71<br>(.031, 1.61)  | 2          | 0.75<br>(.044, 1.03)  | 5          | NA                   |            |
| CHL                                      | 0.79<br>(.052, 1.20)  | 5          | 0.50<br>(.013, 2.00) | 2          | 0.82<br>(.065, 1.04) | 5          | 1.29<br>(.013, 12.82) | 2          | 0.67<br>(.030, 1.50) | 4          | 0.90<br>(.048, 1.67)  | 4          | 0.65<br>(.034, 1.22) | 3          | 0.97<br>(.043, 2.20)  | 4          | 0.45<br>(.017, 1.21)  | 2          | 0.72<br>(.043, 1.20) | 3          |
| GLU                                      | 0.87<br>(.055, 1.37)  | 6          | NA                   |            | 0.84<br>(.047, 1.47) | 6          | NA                    |            | 0.72<br>(.036, 1.45) | 5          | 1.14<br>(.046, 2.83)  | 8          | 0.74<br>(.040, 1.38) | 5          | 1.14<br>(.037, 3.57)  | 7          | 1.14<br>(.053, 2.47)  | 9          | 0.80<br>(.046, 1.39) | 4          |
| GMCSF                                    | 1.03<br>(.057, 1.84)  | 7          | NA                   |            | 1.11<br>(.048, 2.57) | 7          | NA                    |            | NA                   |            | 1.06<br>(.053, 2.13)  | 6          | NA                   |            | 1.12<br>(.046, 2.72)  | 8          | 0.91<br>(.050, 1.65)  | 6          | 1.88<br>(.043, 7.38) | 7          |
| ZIN                                      | 1.09<br>(.056, 2.12)  | 8          | 1.09<br>(.084, 1.40) | 6          | NA                   |            | NA                    |            | NA                   |            | 1.09<br>(.049, 2.39)  | 7          | NA                   |            | 1.09<br>(.038, 3.11)  | 6          | 1.09<br>(.058, 2.05)  | 8          | NA                   |            |
| CTL                                      | reference             | 9          | reference            | 5          | reference            | 8          | reference             | 1          | reference            | 6          | reference             | 5          | reference            | 6          | reference             | 5          | reference             | 7          | reference            | 6          |
| MIS                                      | 3.11<br>(.081, 11.92) | 10         | NA                   |            | NA                   |            | 3.11<br>(.013, 76.62) | 3          | NA                   |            | 3.47<br>(.075, 16.19) | 9          | NA                   |            | 3.11<br>(.065, 14.95) | 9          | 3.11<br>(.083, 11.73) | 10         | NA                   |            |
| Overall inconsistency $\chi^2$ (P value) | 1.28<br>(P=0.526)     |            | 0.09<br>(P=0.770)    |            | 1.40<br>(P=0.496)    |            | 0.48<br>(P=0.488)     |            | 0.68<br>(P=0.409)    |            | 0.04<br>(P=0.836)     |            | 0.90<br>(P=0.637)    |            | 0.02<br>(P=0.876)     |            | 0.07<br>(P=0.796)     |            | 0.70<br>(P=0.401)    |            |
| Number of studies                        | 29                    |            | 6                    |            | 20                   |            | 3                     |            | 13                   |            | 16                    |            | 15                   |            | 14                    |            | 13                    |            | 12                   |            |

**Abbreviations:** 5FU regimen, 5FU based regimen; N5FU regimen; Non-5FU based regimen; AMET regimen; Antimetabolite regimen; NAMET regimen. Non-antimetabolite regimen; NA, Not available; AMI, Amifostine; CHL, Chlorhexidine; CRY, Cryotherapy; GLU, Glutamine; GMCSF, Granulocyte macrophage colony-stimulating factor; MIS, Misoprostol; PFM, Palifermin; SUC, Sucralfate; ZIN, Zinc sulfate; CTL, Control

**Table S6 Sensitivity analyses for preventing chemotherapy induced oral mucositis in adult cancer patients**

The following table shows the effect sizes (risk ratio) and the rank order (SUCRA ranks) compared to control before (standard analysis) and after sensitivity analyses.

| Treatment name                                   | Standard analysis    | SUCRA rank | Excluding studies with non-WHO | SUCRA rank | Excluding studies with inappropriate of Time to measurement mucositis | SUCRA rank | Excluding studies with small sample size (less than 25 <sup>th</sup> Percentile) | SUCRA rank | excluding studies with co-intervention | SUCRA rank | Excluding studies with high risk of bias | SUCRA rank |
|--------------------------------------------------|----------------------|------------|--------------------------------|------------|-----------------------------------------------------------------------|------------|----------------------------------------------------------------------------------|------------|----------------------------------------|------------|------------------------------------------|------------|
| CRY                                              | 0.51<br>(.38, 0.68)  | 1          | 0.43<br>(.26, 0.73)            | 2          | 0.51<br>(.38, 0.70)                                                   | 1          | 0.49<br>(.37, 0.65)                                                              | 1          | 0.17<br>(.05, 0.54)                    | 1          | NA                                       |            |
| SUC                                              | 0.52<br>(.27, 0.99)  | 2          | 0.24<br>(.12, 0.49)            | 1          | 1.06<br>(.55, 2.43)                                                   | 6          | 0.51<br>(.12, 2.17)                                                              | 2          | 1.06<br>(.55, 2.03)                    | 6          | 0.51<br>(.12, 2.17)                      | 1          |
| PFM                                              | 0.72<br>(.51, 0.99)  | 3          | 0.72<br>(.54, 0.96)            | 3          | 0.72<br>(.54, 0.96)                                                   | 3          | 0.72<br>(.54, 0.96)                                                              | 5          | 0.71<br>(.58, 0.88)                    | 4          | 0.72<br>(.54, 0.96)                      | 2          |
| AMI                                              | 0.75<br>(.43, 1.31)  | 4          | 0.75<br>(.43, 1.30)            | 4          | 0.75<br>(.43, 1.30)                                                   | 4          | 0.86<br>(.72, 1.30)                                                              | 3          | 0.75<br>(.43, 1.30)                    | 3          | NA                                       |            |
| CHL                                              | 0.79<br>(.52, 1.20)  | 5          | 4.31<br>(1.04, 17.87)          | 8          | 0.76<br>(.58, 0.98)                                                   | 2          | 1.01<br>(.60, 1.71)                                                              | 7          | 4.31<br>(1.04, 17.87)                  | 10         | NA                                       |            |
| GLU                                              | 0.87<br>(.55, 1.37)  | 6          | NA                             |            | 0.67<br>(.23, 1.99)                                                   | 5          | 0.67<br>(.23, 1.99)                                                              | 4          | 0.67<br>(.23, 1.99)                    | 2          | 1.09<br>(.88, 1.35)                      | 6          |
| GMCSF                                            | 1.03<br>(.57, 1.84)  | 7          | NA                             |            | 1.11<br>(.48, 2.57)                                                   | 7          | 0.91<br>(.80, 1.04)                                                              | 6          | 1.11<br>(.48, 2.57)                    | 8          | 1.11<br>(.48, 2.57)                      | 4          |
| ZIN                                              | 1.09<br>(.56, 2.12)  | 8          | 1.09<br>(.84, 1.40)            | 6          | 1.09<br>(.84, 1.40)                                                   | 9          | 1.09<br>(.84, 1.40)                                                              | 8          | 1.09<br>(.84, 1.40)                    | 7          | 1.09<br>(.84, 1.40)                      | 5          |
| CTL                                              | reference            | 9          | reference                      | 5          | reference                                                             | 8          | reference                                                                        | 9          | reference                              | 5          | reference                                | 3          |
| MIS                                              | 3.11<br>(.81, 11.92) | 10         | 3.11<br>(.94, 10.27)           | 7          | 3.11<br>(.94, 10.27)                                                  | 10         | NA                                                                               |            | 3.11<br>(.94, 10.27)                   | 9          | 3.11<br>(.94, 10.27)                     | 7          |
| Overall inconsistency chi <sup>2</sup> (P value) | 1.28<br>(P=0.526)    |            | 0.08<br>(P=0.778)              |            | 1.52<br>(P=0.467)                                                     |            | 2.45<br>(P=0.293)                                                                |            | 0.03<br>(P=0.868)                      |            | 0.06<br>(P=0.813)                        |            |
| Number of studies                                | 29                   |            | 15                             |            | 23                                                                    |            | 22                                                                               |            | 12                                     |            | 13                                       |            |

**Abbreviations:** NA, Not available; AMI, Amifostine; CHL, Chlorhexidine; CRY, Cryotherapy; GLU, Glutamine; GMCSF, Granulocyte macrophage colony-stimulating factor; MIS, Misoprostol; PFM, Palifermin; SUC, Sucralfate; ZIN, Zinc sulfate; CTL, Control

Figure S9 Comparison-adjusted funnel plot for the network of any grade mucositis in all comparison

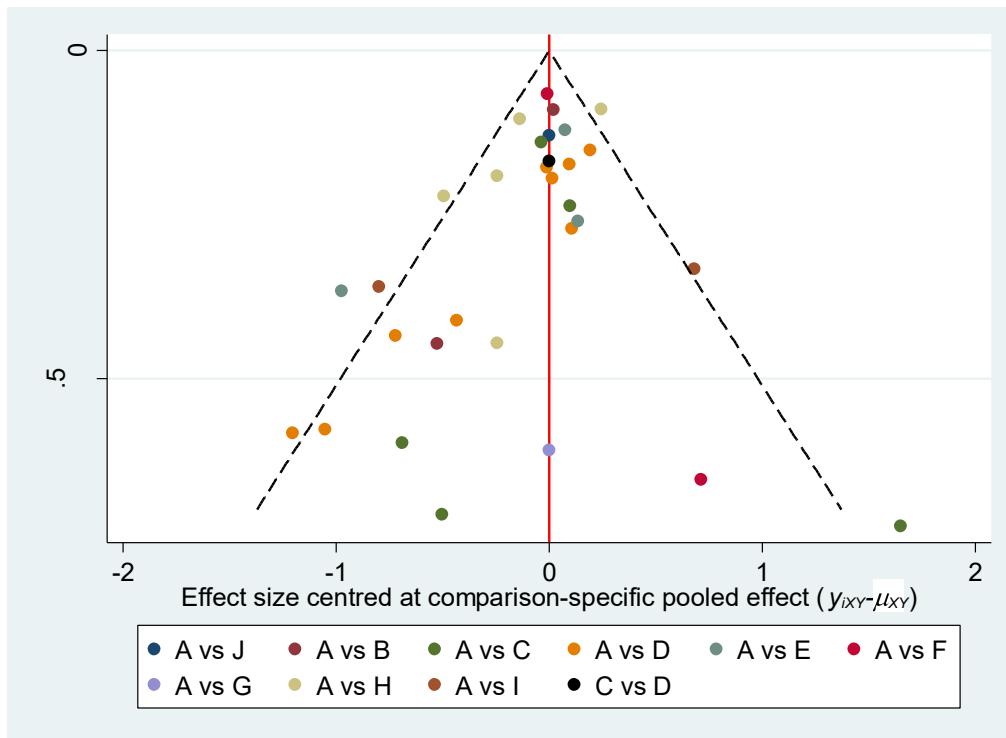

Abbreviations: A-CTL, B-AMI, C-CHL, D-CRY, E-GLU, F-GMCSF, G-MIS, H-PFM, I-SUC, J-ZIN

**Figure S10 Comparison-adjusted funnel plot for the network of mild to moderate mucositis (grade 1-2) in all comparisons**

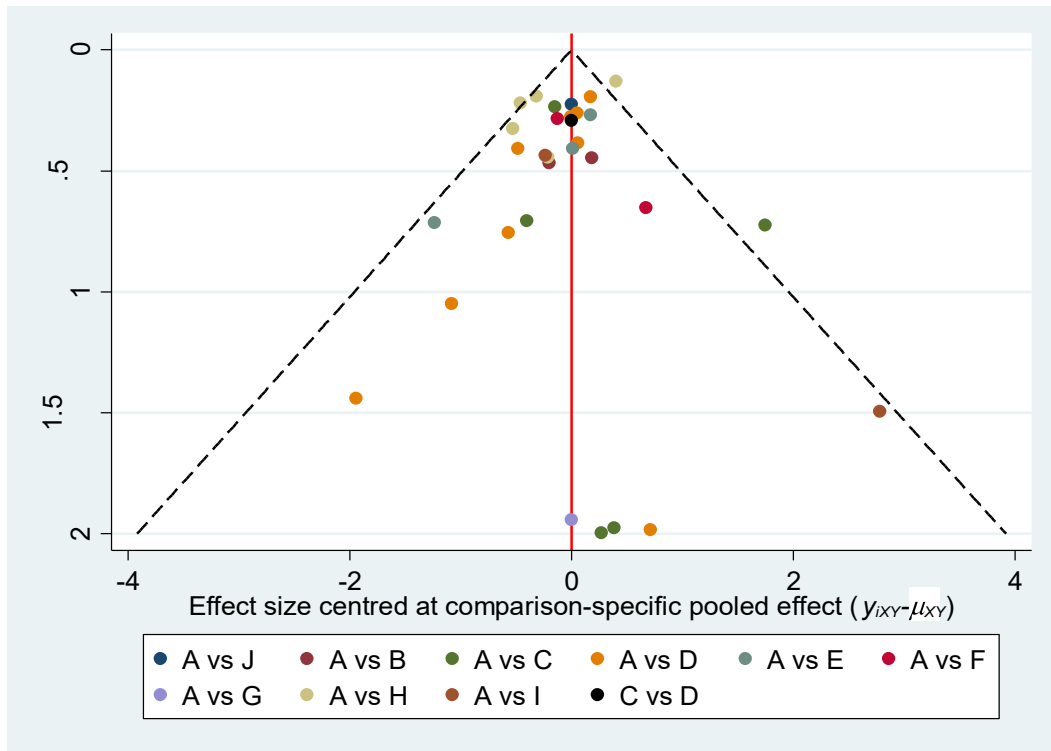

**Abbreviations:** A=CTL, B=AMI, C=CHL, D=CRY, E=GLU, F=GMCSE, G=PFM, H=SUC, I=ZIN

**Figure S11 Comparison-adjusted funnel plot for the network of severe mucositis (grade 3-4) in all comparisons**

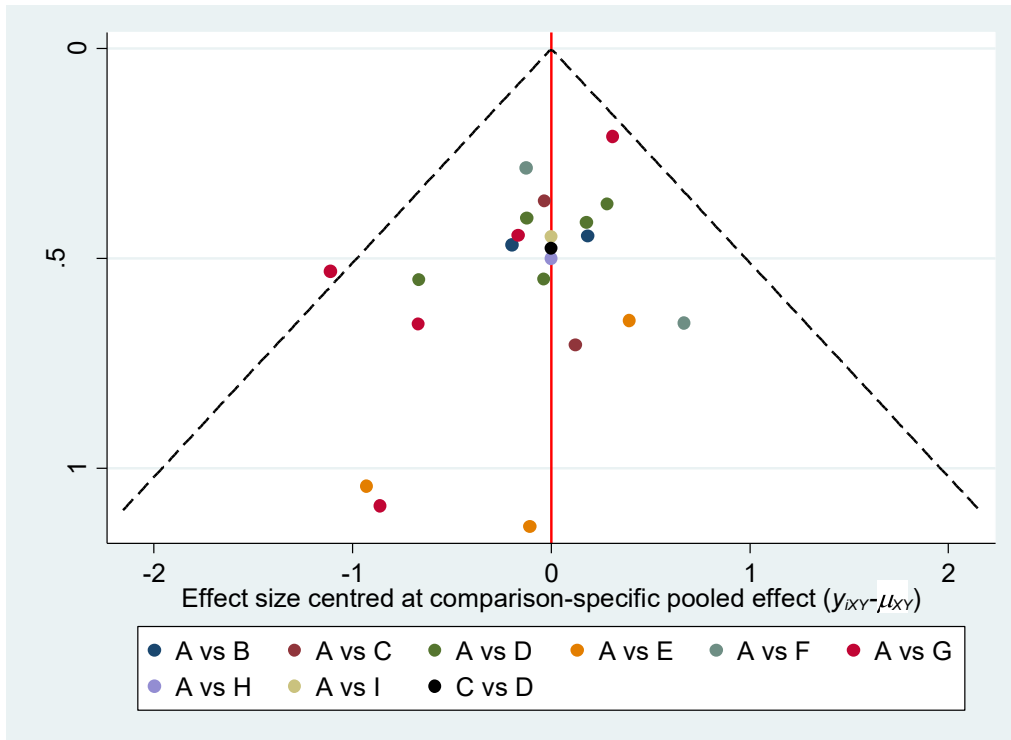

**Abbreviations:** A-CTL, B-AMI, C-CHL, D-CRY, E-GLU, F-GMCSF, G-PFM, H-SUC, I-ZIN

**Figure S12 Comparison-adjusted funnel plot for the network of taste disturbance in all comparisons**

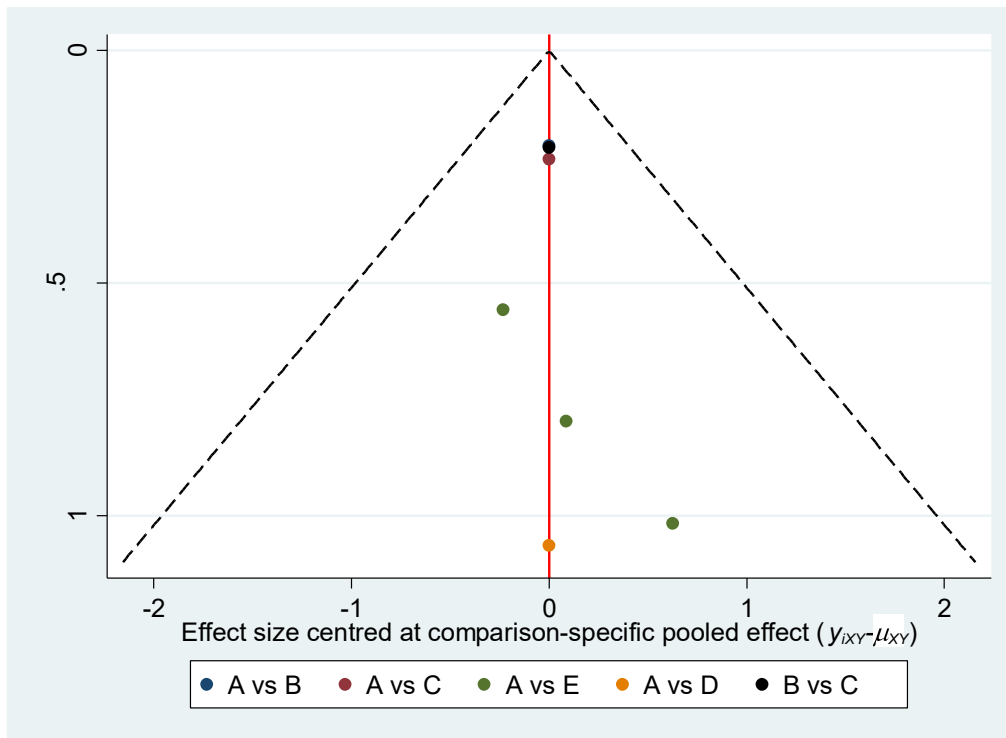

Abbreviations: A-CTL, B-CHL, C-CRY, D-GLU, E-PFM

**Figure S13 Comparison-adjusted funnel plot for the network of gastrointestinal adverse events in all comparisons**

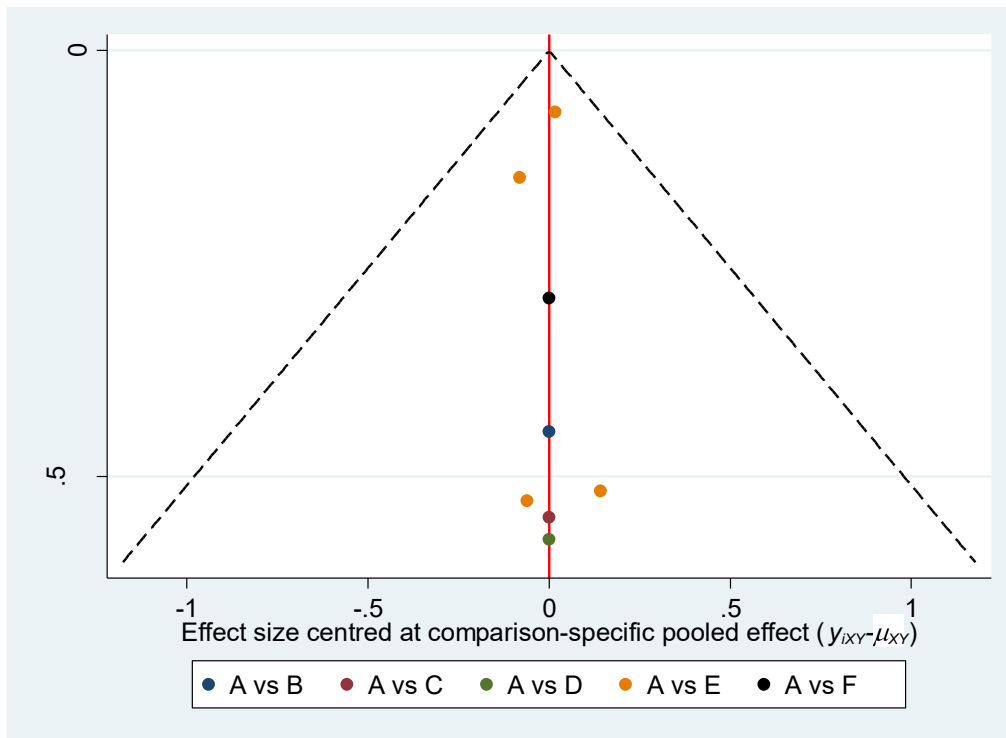

Abbreviations: A=CTL, B=AMI, C=GLU, D=MIS, E=PFM, F=SUC



**Figure S14 Comparison-adjusted funnel plot for the network of skin reaction adverse events in all comparisons**

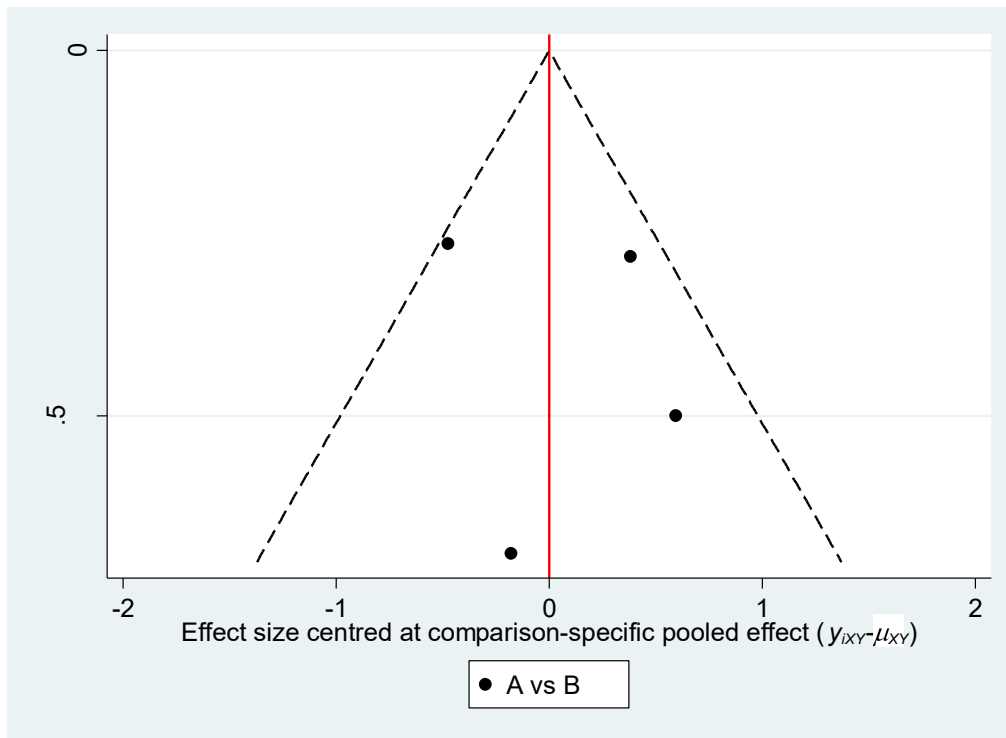

Abbreviations: A=CTL, B=PFM

**Table S7 Summary of findings table for intervention vs control for preventing chemotherapy induced oral mucositis in adult cancer patients**

| Comparison                 | Direct evidence                |                                 |                                                                                              | Network meta-analysis          |                                                                      |
|----------------------------|--------------------------------|---------------------------------|----------------------------------------------------------------------------------------------|--------------------------------|----------------------------------------------------------------------|
|                            | Effect estimate<br>RR (95% CI) | Heterogeneity<br>I <sup>2</sup> | Quality of evidence<br>(GRADE)                                                               | Effect estimate<br>RR (95% CI) | Quality of evidence<br>(GRADE)                                       |
| <b>Any grade mucositis</b> |                                |                                 |                                                                                              |                                |                                                                      |
| AMI vs CTL                 | 0.75<br>(.43, 1.30)            | 49.40%                          | ⊕⊕○○<br><b>LOW</b><br>[downgraded for imprecision and inconsistency]                         | 0.75<br>(.43, 1.31)            | ⊕⊕⊕○<br><b>MODERATE</b><br>[downgraded for imprecision]              |
| CHL vs CRY                 | 0.87<br>(.63, 1.21)            | NA                              | ⊕⊕○○<br><b>LOW</b><br>[downgraded for imprecision and risk of bias]                          | 0.64<br>(.40, 1.04)            | ⊕⊕○○<br><b>LOW</b><br>[downgraded for imprecision, and risk of bias] |
| CHL vs CTL                 | 0.85<br>(.56, 1.30)            | 46.20%                          | ⊕⊕○○<br><b>LOW</b><br>[downgraded for imprecision and inconsistency]                         | 0.79<br>(.52, 1.20)            | ⊕⊕⊕○<br><b>MODERATE</b><br>[downgraded for imprecision]              |
| CRY vs CTL                 | 0.52<br>(.41, 0.66)            | 48.40%                          | ⊕○○○<br><b>VERY LOW</b><br>[downgraded for inconsistency, risk of bias and publication bias] | 0.51<br>(.38, 0.68)            | ⊕⊕⊕○<br><b>MODERATE</b><br>[downgraded for and risk of bias]         |
| GLU vs CTL                 | 0.84<br>(.47, 1.47)            | 77.10%                          | ⊕○○○<br><b>VERY LOW</b><br>[downgraded for imprecision, inconsistency and indirectness]      | 0.87<br>(.55, 1.37)            | ⊕⊕○○<br><b>LOW</b><br>[downgraded for imprecision, and indirectness] |
| GMCSF vs CTL               | 1.11<br>(.48, 2.57)            | 53.40%                          | ⊕○○○<br><b>VERY LOW</b><br>[downgraded for imprecision, inconsistency and indirectness]      | 1.03<br>(.57, 1.84)            | ⊕⊕○○<br><b>LOW</b><br>[downgraded for imprecision, and indirectness] |
| MIS vs CTL                 | 3.11<br>(.94, 10.27)           | NA                              | ⊕⊕⊕○<br><b>MODERATE</b><br>[downgraded for imprecision]                                      | 3.11<br>(.81, 11.92)           | ⊕⊕⊕○<br><b>MODERATE</b><br>[downgraded for imprecision]              |
| PFM vs CTL                 | 0.72<br>(.54, 0.96)            | 76.10%                          | ⊕⊕⊕○<br><b>MODERATE</b><br>[downgraded for inconsistency]                                    | 0.72<br>(.51, 0.99)            | ⊕⊕⊕⊕<br><b>HIGH</b>                                                  |

| Comparison              | Direct evidence                |                                 |                                                                                         | Network meta-analysis          |                                                                      |
|-------------------------|--------------------------------|---------------------------------|-----------------------------------------------------------------------------------------|--------------------------------|----------------------------------------------------------------------|
|                         | Effect estimate<br>RR (95% CI) | Heterogeneity<br>I <sup>2</sup> | Quality of evidence<br>(GRADE)                                                          | Effect estimate<br>RR (95% CI) | Quality of evidence<br>(GRADE)                                       |
| SUC vs CTL              | 0.51<br>(.12, 2.17)            | 89.10%                          | ⊕○○○<br><b>VERY LOW</b><br>[downgraded for imprecision, inconsistency and indirectness] | 0.52<br>(.27, 0.99)            | ⊕⊕⊕○<br><b>MODERATE</b><br>[downgraded for indirectness]             |
| ZIN vs CTL              | 1.09<br>(.84, 1.40)            | NA                              | ⊕⊕○○<br><b>LOW</b><br>[downgraded for imprecision and indirectness]                     | 1.09<br>(.56, 2.12)            | ⊕⊕○○<br><b>LOW</b><br>[downgraded for imprecision, and indirectness] |
| <b>Severe mucositis</b> |                                |                                 |                                                                                         |                                |                                                                      |
| AMI vs CTL              | 0.42<br>(.22, 0.78)            | 0.00%                           | ⊕⊕⊕⊕<br><b>HIGH</b>                                                                     | 0.42<br>(.20, 0.86)            | ⊕⊕⊕⊕<br><b>HIGH</b>                                                  |
| CHL vs CRY              | 0.78<br>(.31, 1.98)            | NA                              | ⊕⊕○○<br><b>LOW</b><br>[downgraded for imprecision and risk of bias]                     | 0.82<br>(.37, 1.82)            | ⊕⊕○○<br><b>LOW</b><br>[downgraded for imprecision and risk of bias]  |
| CHL vs CTL              | 0.44<br>(.23, 0.83)            | 0.00%                           | ⊕⊕⊕⊕<br><b>HIGH</b>                                                                     | 0.46<br>(.22, 0.95)            | ⊕⊕⊕⊕<br><b>HIGH</b>                                                  |
| CRY vs CTL              | 0.38<br>(.26, 0.56)            | 0.00%                           | ⊕⊕⊕○<br><b>MODERATE</b><br>[downgraded for risk of bias]                                | 0.37<br>(.24, 0.58)            | ⊕⊕⊕○<br><b>MODERATE</b><br>[downgraded for risk of bias]             |
| GLU vs CTL              | 0.56<br>(.21, 1.47)            | 0.00%                           | ⊕⊕○○<br><b>LOW</b><br>[downgraded for imprecision and indirectness]                     | 0.54<br>(.20, 1.52)            | ⊕⊕○○<br><b>LOW</b><br>[downgraded for imprecision and indirectness]  |
| GMCSF vs CTL            | 1.02<br>(.52, 1.09)            | 22.10%                          | ⊕⊕○○<br><b>LOW</b><br>[downgraded for imprecision and indirectness]                     | 1.01<br>(.52, 1.99)            | ⊕⊕○○<br><b>LOW</b><br>[downgraded for imprecision and indirectness]  |
| PFM vs CTL              | 0.56<br>(.30, 1.05)            | 53.40%                          | ⊕⊕○○<br><b>LOW</b><br>[downgraded for imprecision and inconsistency]                    | 0.65<br>(.38, 1.10)            | ⊕⊕⊕○<br><b>MODERATE</b><br>[downgraded for imprecision]              |

| Comparison | Direct evidence                |                                 |                                                                             | Network meta-analysis          |                                                                           |
|------------|--------------------------------|---------------------------------|-----------------------------------------------------------------------------|--------------------------------|---------------------------------------------------------------------------|
|            | Effect estimate<br>RR (95% CI) | Heterogeneity<br>I <sup>2</sup> | Quality of evidence<br>(GRADE)                                              | Effect estimate<br>RR (95% CI) | Quality of evidence<br>(GRADE)                                            |
| SUC vs CTL | 0.31<br>(0.12, 0.82)           | NA                              | ⊕⊕○○<br><b>LOW</b><br>[downgraded for<br>inconsistency and<br>indirectness] | 0.31<br>(0.10, 0.93)           | ⊕⊕⊕○<br><b>MODERATE</b><br>[downgraded for<br>indirectness]               |
| ZIN vs CTL | 0.88<br>(0.36, 2.11)           | NA                              | ⊕⊕○○<br><b>LOW</b><br>[downgraded for<br>imprecision and<br>indirectness]   | 0.88<br>(0.32, 2.41)           | ⊕⊕○○<br><b>LOW</b><br>[downgraded for<br>imprecision and<br>indirectness] |

**Abbreviations:** NA, not available; AMI, Amifostine; CHL, Chlorhexidine; CRY, Cryotherapy; GLU, Glutamine; GMCSF, Granulocyte macrophage colony-stimulating factor; MIS, Misoprostol; PFM, Palifermin; SUC, sucralfate; ZIN, Zinc sulfate; CTL, Control
